# Supplementary material
Source: HighWire-hosted journal article supplement (https://bmjopen.bmj.com/content/10/5/e033365)

Supplementary Figure 1. Overview of Japan's universal healthcare system

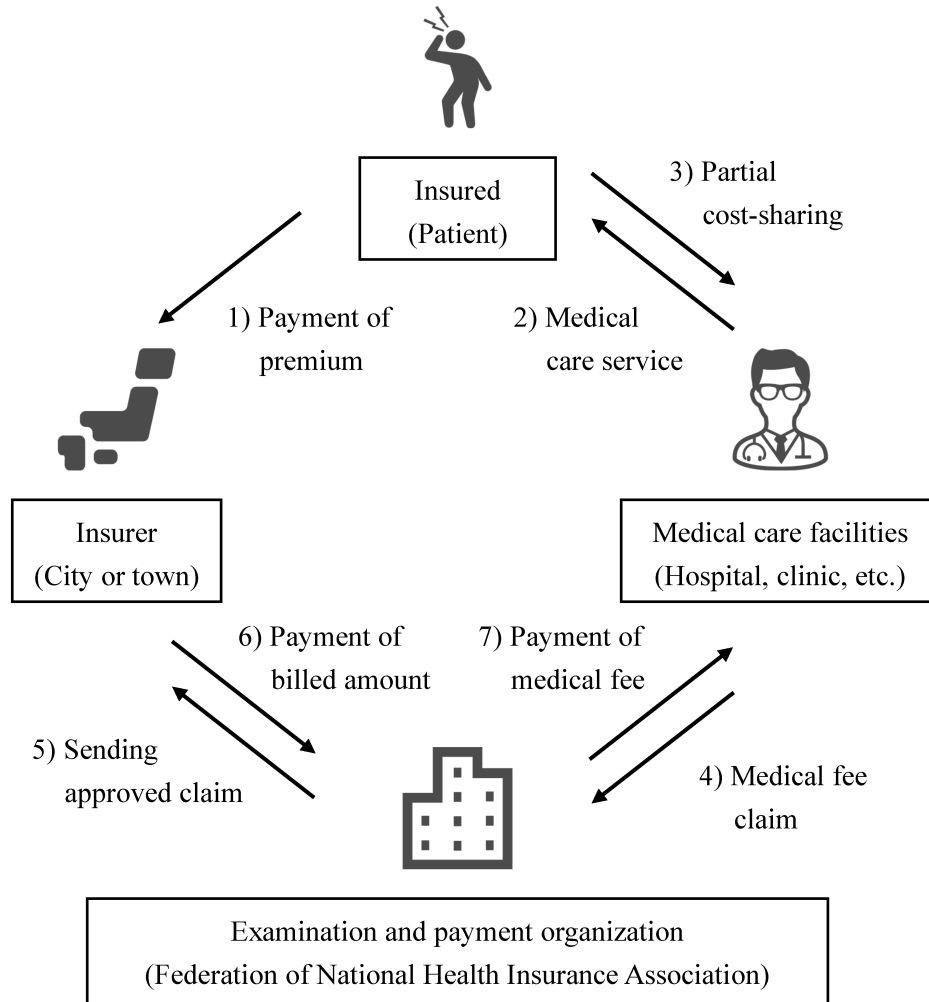

Supplement: inline-supplementary-material-1 [file inline-supplementary-material-1.pdf]
